# Supplementary material for: Molecular Evolution and Functional Diversification of Fatty Acid Desaturases after Recurrent Gene Duplication in Drosophila
Source: PubMed Central journal article supplement — Mol Biol Evol. 2009 Mar 23;26(7):1447–56. doi: 10.1093/molbev/msp057 (PMC2693736; doi:10.1093/molbev/msp057), 2009-03-23
Supplement: msp057_1.pdf [file msp057_1.pdf]

Table S1. Homologs of *fatty acid desaturase* genes in 12 *Drosophila* genomes<sup>a</sup>

| Ortholog             | Species                            | Symbol (Synonym)                                 | Flybase ID                          | Genomic location                          |
|----------------------|------------------------------------|--------------------------------------------------|-------------------------------------|-------------------------------------------|
| <i>desat1</i>        | <i>D. melanogaster</i>             | CG5887 ( <i>dmel_desat1</i> )                    | FBgn0086687                         | 3R:8270531..8272663 [+]                   |
|                      | <i>D. simulans</i>                 | GD18837 ( <i>dsim_GLEANR_2646</i> )              | FBgn0027803                         | 3R:13116857..13118963 [-]                 |
|                      | <i>D. sechellia</i>                | GM24036 ( <i>dsec_GLEANR_7049</i> ) <sup>b</sup> | FBgn0178901                         | scaffold_0:13674699..13676859 [-]         |
|                      | <i>D. yakuba</i>                   | GE26198 ( <i>dyak_GLEANR_9761</i> )              | FBgn0067988                         | 3R:12593935..12595999 [+]                 |
|                      | <i>D. erecta</i>                   | GG18949 ( <i>dere_GLEANR_374</i> )               | FBgn0111155                         | scaffold_4770:13348445..13350478 [-]      |
|                      | <i>D. ananassae</i>                | GF17961 ( <i>dana_GLEANR_19223</i> )             | FBgn0094979                         | scaffold_13340:7652350..7654184 [+]       |
|                      | <i>D. persimilis</i>               | GL27316 ( <i>dper_GLEANR_9932</i> )              | FBgn0164897                         | scaffold_19:1215069..1216653 [+]          |
|                      | <i>D. pseudoobscura</i>            | GA19204 ( <i>dpse_GLEANR_5093</i> )              | FBgn0079201                         | 2:5,498,572..5,500,156 [+]                |
|                      | <i>D. willistoni</i>               | GK14407 ( <i>dwil_GLEANR_14726</i> )             | FBgn0216413                         | scf2_1100000004943:14785806..14787424 [-] |
|                      | <i>D. mojavensis</i>               | GI10485 ( <i>dmoj_GLEANR_10408</i> )             | FBgn0133249                         | scaffold_6540:27937726..27939979 [+]      |
|                      | <i>D. virilis</i>                  | GJ23166 ( <i>dvir_GLEANR_8526</i> )              | FBgn0210268                         | scaffold_13047:8252067..8254552 [-]       |
| <i>D. grimshawi</i>  | GH21229 ( <i>dgri_GLEANR_541</i> ) | FBgn0128691                                      | scaffold_15074:1355903..1358096 [+] |                                           |
| <i>desat2</i>        | <i>D. melanogaster</i>             | CG5925 ( <i>dmel_desat2</i> )                    | FBgn0043043                         | 3R:8262143..8263481 [+]                   |
|                      | <i>D. simulans</i>                 | GD18836 ( <i>dsim_GLEANR_2645</i> )              | FBgn0190352                         | 3R:13126012..13127348 [-]                 |
|                      | <i>D. sechellia</i>                | GM24035 ( <i>dsec_GLEANR_7048</i> )              | FBgn0178900                         | scaffold_0:13683759..13685095 [-]         |
|                      | <i>D. yakuba</i>                   | GE26197 ( <i>dyak_GLEANR_9760</i> )              | FBgn0243231                         | 3R:12585391..12586717 [+]                 |
|                      | <i>D. erecta</i>                   | NA                                               |                                     |                                           |
|                      | <i>D. ananassae</i>                | GF17959 ( <i>dana_GLEANR_19221</i> )             | FBgn0094977                         | scaffold_13340:7642863..7644162 [+]       |
|                      | <i>D. persimilis</i>               | GL27314 ( <i>dper_GLEANR_9930</i> )              | FBgn0164895                         | scaffold_19:1204796..1206118 [+]          |
|                      | <i>D. pseudoobscura</i>            | GA19234 ( <i>dpse_GA19234</i> )                  | FBgn0079231                         | 2:5488491..5489718 [+]                    |
|                      | <i>D. willistoni</i>               | GK14406 ( <i>dwil_GLEANR_14725</i> )             | FBgn0216412                         | scf2_1100000004943:14779457..14780725 [-] |
|                      | <i>D. mojavensis</i>               | GI10484 ( <i>dmoj_GLEANR_10407</i> )             | FBgn0133248                         | scaffold_6540:27929644..27930945 [+]      |
|                      | <i>D. virilis</i>                  | GJ23165 ( <i>dvir_GLEANR_8525</i> )              | FBgn0210267                         | scaffold_13047:8261264..8262614 [-]       |
| <i>D. grimshawi</i>  | GH21218 ( <i>dgri_GLEANR_540</i> ) | FBgn0128680                                      | scaffold_15074:1348964..1350306 [+] |                                           |
| <i>Fad2 (desatF)</i> | <i>D. melanogaster</i>             | CG7923 ( <i>dmel_Fad2, desatF-α</i> )            | FBgn0029172                         | 3L:11016639..11017706 [+]                 |
|                      | <i>D. simulans</i>                 | GD14271 ( <i>dsim_GLEANR_14282, desatF-α</i> )   | FBgn0185956                         | 3L:10413484..10414551 [+]                 |
|                      | <i>D. sechellia</i>                | GM25238 ( <i>dsec_GLEANR_8211, desatF-α</i> )    | FBgn0180098                         | scaffold_0:3239851..3240915 [+]           |

Table S1. (Continued)

| Ortholog | Species                 | Symbol (Synonym)                                                    | Flybase ID  | Genomic location                        |
|----------|-------------------------|---------------------------------------------------------------------|-------------|-----------------------------------------|
|          | <i>D. yakuba</i>        | GE21776 ( <i>dyak_GLEANR_5510</i> , <i>desatF-α</i> ) <sup>c</sup>  | FBgn0239021 | 3L:11044102..11045156 [+]               |
|          | <i>D. erecta</i>        | GG15465 ( <i>dere_GLEANR_15537</i> , <i>desatF-α</i> )              | FBgn0107716 | scaffold_4784:11026003..11027067 [+]    |
|          | <i>D. ananassae</i>     | GF24026 ( <i>dana_GLEANR_8783</i> , <i>desatF-α</i> ) <sup>d</sup>  | FBgn0101020 | scaffold_13337:12461680..12462747 [-]   |
|          |                         | GF16174 ( <i>dana_GLEANR_17446</i> , <i>desatF-δ</i> ) <sup>d</sup> | FBgn0093196 | scaffold_13340:21312697..21313764 [-]   |
|          |                         | GF18504 ( <i>dana_GLEANR_19760</i> , <i>desatF-ε</i> ) <sup>d</sup> | FBgn0095522 | scaffold_13340:15668648..15669706 [+]   |
|          | <i>D. persimilis</i>    | GL15669 ( <i>dper_GLEANR_17057</i> , <i>desatF-α</i> )              | FBgn0153273 | scaffold_47:509015..510076 [-]          |
|          |                         | GL23117 ( <i>dper_GLEANR_5476</i> , <i>desatF-β</i> ) <sup>d</sup>  | FBgn0160707 | scaffold_0:9749674..9750762 [-]         |
|          |                         | GL22317 ( <i>dper_GLEANR_4392</i> , <i>desatF-γ</i> ) <sup>d</sup>  | FBgn0159909 | scaffold_3:6548217..6549302 [+]         |
|          | <i>D. pseudoobscura</i> | GA20691 ( <i>dpse_GLEANR_1238</i> , <i>desatF-α</i> )               | FBgn0080685 | XR_group6:6011391..6012452 [-]          |
|          |                         | GA27148 ( <i>dpse_GLEANR_5384</i> , <i>desatF-β</i> ) <sup>d</sup>  | FBgn0248519 | 2:10728335..10729423 [+]                |
|          |                         | GA27452 ( <i>dpse_GLEANR_6152</i> , <i>desatF-γ</i> ) <sup>d</sup>  | FBgn0248819 | 2:23774445..23775530 [+]                |
|          | <i>D. willistoni</i>    | GK17186 ( <i>dwil_GLEANR_17505</i> , <i>desatF-ξ</i> ) <sup>d</sup> | FBgn0219185 | scf2_1100000004511:2193764..2194855 [+] |
|          |                         | GK11373 ( <i>dwil_GLEANR_1159</i> , <i>desatF-η</i> ) <sup>d</sup>  | FBgn0213384 | scf2_1100000004762:97180..98253 [+]     |
|          | <i>D. mojavensis</i>    | NA <sup>e</sup>                                                     |             |                                         |
|          | <i>D. virilis</i>       | NA <sup>e</sup>                                                     |             |                                         |
|          | <i>D. grimshawi</i>     | NA <sup>e</sup>                                                     |             |                                         |
| CG8630   | <i>D. melanogaster</i>  | CG8630                                                              | FBgn0038130 | 3R:9108124..9109675 [+]                 |
|          | <i>D. simulans</i>      | GD18893 ( <i>dsim_GLEANR_2702</i> )                                 | FBgn0190404 | 3R:12316156..12317679 [-]               |
|          | <i>D. sechellia</i>     | GM24094 ( <i>dsec_GLEANR_7103</i> )                                 | FBgn0178958 | scaffold_0:12894947..12896458 [-]       |
|          | <i>D. yakuba</i>        | GE26257 ( <i>dyak_GLEANR_9814</i> )                                 | FBgn0243288 | 3R:13412487..13414053 [+]               |
|          | <i>D. erecta</i>        | GG19533 ( <i>dere_GLEANR_427</i> )                                  | FBgn0111735 | scaffold_4770:12539421..12541069 [-]    |
|          | <i>D. ananassae</i>     | GF17588 ( <i>dana_GLEANR_18851</i> )                                | FBgn0094606 | scaffold_13340:1662762..1664203 [+]     |
|          | <i>D. persimilis</i>    | GL24461 ( <i>dper_GLEANR_6749</i> )                                 | FBgn0162050 | scaffold_0:10476768..10488896 [+]       |
|          | <i>D. pseudoobscura</i> | GA21221 ( <i>dpse_GLEANR_4085</i> )                                 | FBgn0081209 | 2:9994113..9995561 [-]                  |
|          | <i>D. willistoni</i>    | GK13932 ( <i>dwil_GLEANR_14252</i> )                                | FBgn0215938 | scf2_1100000004943:6191658..6193093 [+] |
|          | <i>D. mojavensis</i>    | GI24327 ( <i>dmoj_GLEANR_9484</i> )                                 | FBgn0147050 | scaffold_6540:10145793..10147297 [+]    |
|          | <i>D. virilis</i>       | GJ10413 ( <i>dvir_GLEANR_10340</i> )                                | FBgn0197694 | scaffold_12855:3052346..3053856 [-]     |

Table S1. (Continued)

| Ortholog | Species                 | Symbol (Synonym)                   | Flybase ID  | Genomic location                        |
|----------|-------------------------|------------------------------------|-------------|-----------------------------------------|
|          | <i>D. grimshawi</i>     | <i>GH18426 (dgri_GLEANR_2804)</i>  | FBgn0125894 | scaffold_14906:5753675..5755127 [-]     |
| CG9743   | <i>D. melanogaster</i>  | <i>CG9743</i>                      | FBgn0039756 | 3R:26022359..26024615 [-]               |
|          | <i>D. simulans</i>      | <i>GD17212 (dsim_GLEANR_1736)</i>  | FBgn0188775 | 3R:25690152..25692391 [-]               |
|          | <i>D. sechellia</i>     | <i>GM12168 (dsec_GLEANR_12599)</i> | FBgn0167108 | scaffold_4:4874849..4877078 [-]         |
|          | <i>D. yakuba</i>        | <i>GE23401 (dyak_GLEANR_7191)</i>  | FBgn0240592 | 3R:26956123..26958286 [-]               |
|          | <i>D. erecta</i>        | <i>GG11952 (dere_GLEANR_12006)</i> | FBgn0104247 | scaffold_4820:1973564..1975704 [+]      |
|          | <i>D. ananassae</i>     | <i>GF16192 (dana_GLEANR_17463)</i> | FBgn0093214 | scaffold_13340:21056664..21059300 [-]   |
|          | <i>D. persimilis</i>    | <i>GL14059 (dper_GLEANR_14504)</i> | FBgn0151664 | scaffold_7:4285074..4287260 [+]         |
|          | <i>D. pseudoobscura</i> | <i>GA22002 (dpse_GLEANR_4847)</i>  | FBgn0081987 | 2:1482261..1484415 [+]                  |
|          | <i>D. willistoni</i>    | <i>GK13141 (dwil_GLEANR_13473)</i> | FBgn0215150 | scf2_1100000004943:9484681..9487579 [-] |
|          | <i>D. mojavensis</i>    | <i>GI24323 (dmoj_GLEANR_9480)</i>  | FBgn0147046 | scaffold_6540:10097851..10101121 [+]    |
|          | <i>D. virilis</i>       | <i>GJ10408 (dvir_GLEANR_10336)</i> | FBgn0197690 | scaffold_12855:3095571..3099015 [-]     |
|          | <i>D. grimshawi</i>     | <i>GH18422 (dgri_GLEANR_2800)</i>  | FBgn0125890 | scaffold_14906:5797460..5801093 [-]     |
| CG9747   | <i>D. melanogaster</i>  | <i>CG9747</i>                      | FBgn0039754 | 3R:26011566..26016463 [-]               |
|          | <i>D. simulans</i>      | <i>GD17234 (dsim_GLEANR_1738)</i>  | FBgn0188797 | 3R:25679027..25683922 [-]               |
|          | <i>D. sechellia</i>     | <i>GM12172 (dsec_GLEANR_12601)</i> | FBgn0167112 | scaffold_4:4864314..4869213 [-]         |
|          | <i>D. yakuba</i>        | <i>GE23403 (dyak_GLEANR_7193)</i>  | FBgn0240594 | 3R:26945103..26950087 [-]               |
|          | <i>D. erecta</i>        | <i>GG11954 (dere_GLEANR_12008)</i> | FBgn0104249 | scaffold_4820:1981496..1986547 [+]      |
|          | <i>D. ananassae</i>     | <i>GF16194 (dana_GLEANR_17465)</i> | FBgn0093216 | scaffold_13340:21045994..21051062 [-]   |
|          | <i>D. persimilis</i>    | <i>GL14061 (dper_GLEANR_14506)</i> | FBgn0151666 | scaffold_7:4293137..4297511 [+]         |
|          | <i>D. pseudoobscura</i> | <i>GA22005 (dpse_GLEANR_4849)</i>  | FBgn0081990 | 2:1490305..1494712 [+]                  |
|          | <i>D. willistoni</i>    | <i>GK13143 (dwil_GLEANR_13475)</i> | FBgn0215152 | scf2_1100000004943:9472854..9477605 [-] |
|          | <i>D. mojavensis</i>    | <i>GI24325 (dmoj_GLEANR_9482)</i>  | FBgn0147048 | scaffold_6540:10111520..10118082 [+]    |
|          | <i>D. virilis</i>       | <i>GJ10410 (dvir_GLEANR_10338)</i> | FBgn0197692 | scaffold_12855:3079765..3086153 [-]     |
|          | <i>D. grimshawi</i>     | <i>GH18424 (dgri_GLEANR_2802)</i>  | FBgn0125892 | scaffold_14906:5783728..5789396 [-]     |

Table S1. (Continued)

| Ortholog            | Species                           | Symbol (Synonym)                   | Flybase ID                          | Genomic location                        |
|---------------------|-----------------------------------|------------------------------------|-------------------------------------|-----------------------------------------|
| CG15531             | <i>D. melanogaster</i>            | <i>CG15531</i>                     | FBgn0039755                         | 3R:26020605..26021890 [-]               |
|                     | <i>D. simulans</i>                | <i>GD17223 (dsim_GLEANR_1737)</i>  | FBgn0188786                         | 3R:25688409..25689688 [-]               |
|                     | <i>D. sechellia</i>               | <i>GM12171 (dsec_GLEANR_12600)</i> | FBgn0167111                         | scaffold_4:4873106..4874385 [-]         |
|                     | <i>D. yakuba</i>                  | <i>GE23402 (dyak_GLEANR_7192)</i>  | FBgn0240593                         | 3R:26954354..26955635 [-]               |
|                     | <i>D. erecta</i>                  | <i>GG11953 (dere_GLEANR_12007)</i> | FBgn0104248                         | scaffold_4820:1976171..1977465 [+]      |
|                     | <i>D. ananassae</i>               | <i>GF16193 (dana_GLEANR_17464)</i> | FBgn0093215                         | scaffold_13340:21054974..21056242 [-]   |
|                     | <i>D. persimilis</i>              | <i>GL14060 (dper_GLEANR_14505)</i> | FBgn0151665                         | scaffold_7:4287668..4288986 [+]         |
|                     | <i>D. pseudoobscura</i>           | <i>GA26941 (dpse_GLEANR_4848)</i>  | FBgn0248312                         | 2:1484823..1486141 [+]                  |
|                     | <i>D. willistoni</i>              | <i>GK13142 (dwil_GLEANR_13474)</i> | FBgn0215151                         | scf2_1100000004943:9482984..9484270 [-] |
|                     | <i>D. mojavensis</i>              | <i>GI24324 (dmoj_GLEANR_9481)</i>  | FBgn0147047                         | scaffold_6540:10102110..10103733 [+]    |
|                     | <i>D. virilis</i>                 | <i>GJ10409 (dvir_GLEANR_10337)</i> | FBgn0197691                         | scaffold_12855:3093065..3095092 [-]     |
| <i>D. grimshawi</i> | <i>GH18423 (dgri_GLEANR_2801)</i> | FBgn0125891                        | scaffold_14906:5795284..5796956 [-] |                                         |

- <sup>a</sup> Symbols and genomic locations of each gene are based on the genome release of *D. melanogaster* (R5.2), *D. pseudoobscura* (R2), and Comparative Assembly Freeze 1 (CAF1) of all the other 10 *Drosophila* genomes.
- <sup>b</sup> *desat1* homolog in *D. sechellia* was excluded for all the analyses due to low coverage in the current CAF1 release.
- <sup>c</sup> *GE21776* is the only *desatF* homolog with annotated intron. This gene was not analyzed in codon based analyses.
- <sup>d</sup> homologs are not located in the syntenic region.
- <sup>e</sup> NA, homologs are not available in current genome assembling.

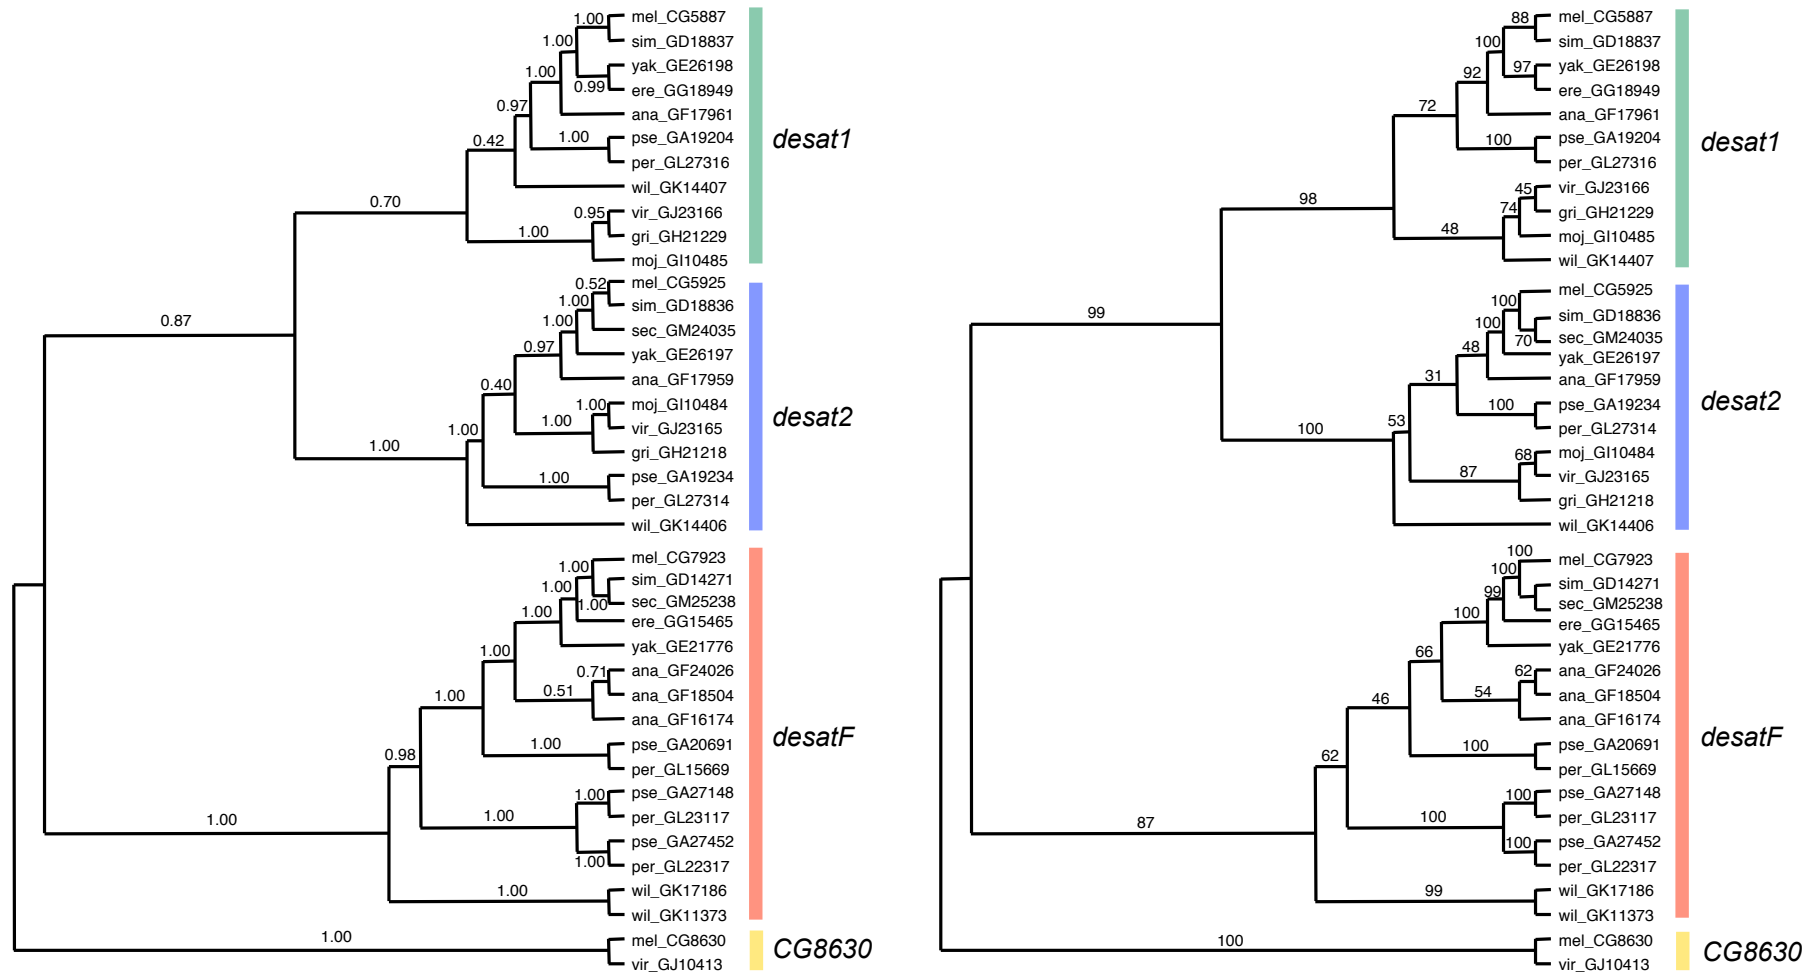

Figure S2. Phylogeny of *desat1*, *desat2*, and *desatF* homologs in *Drosophila*, showing the relationship among the three clades. Both trees obtained by Bayesian inference and maximum parsimony method are shown, and corresponding posterior probabilities and bootstrap values are listed. Bayesian inference used GTR model with gamma distribution, and two runs, each with two million generations, were performed. Trees were sampled per one thousand generations, and 500 of the sampled trees were described as burn-in while summarizing the result. Maximum parsimony method used all sites in the three codon positions without weighting, and branch support was obtained from one thousand bootstrap replicates.



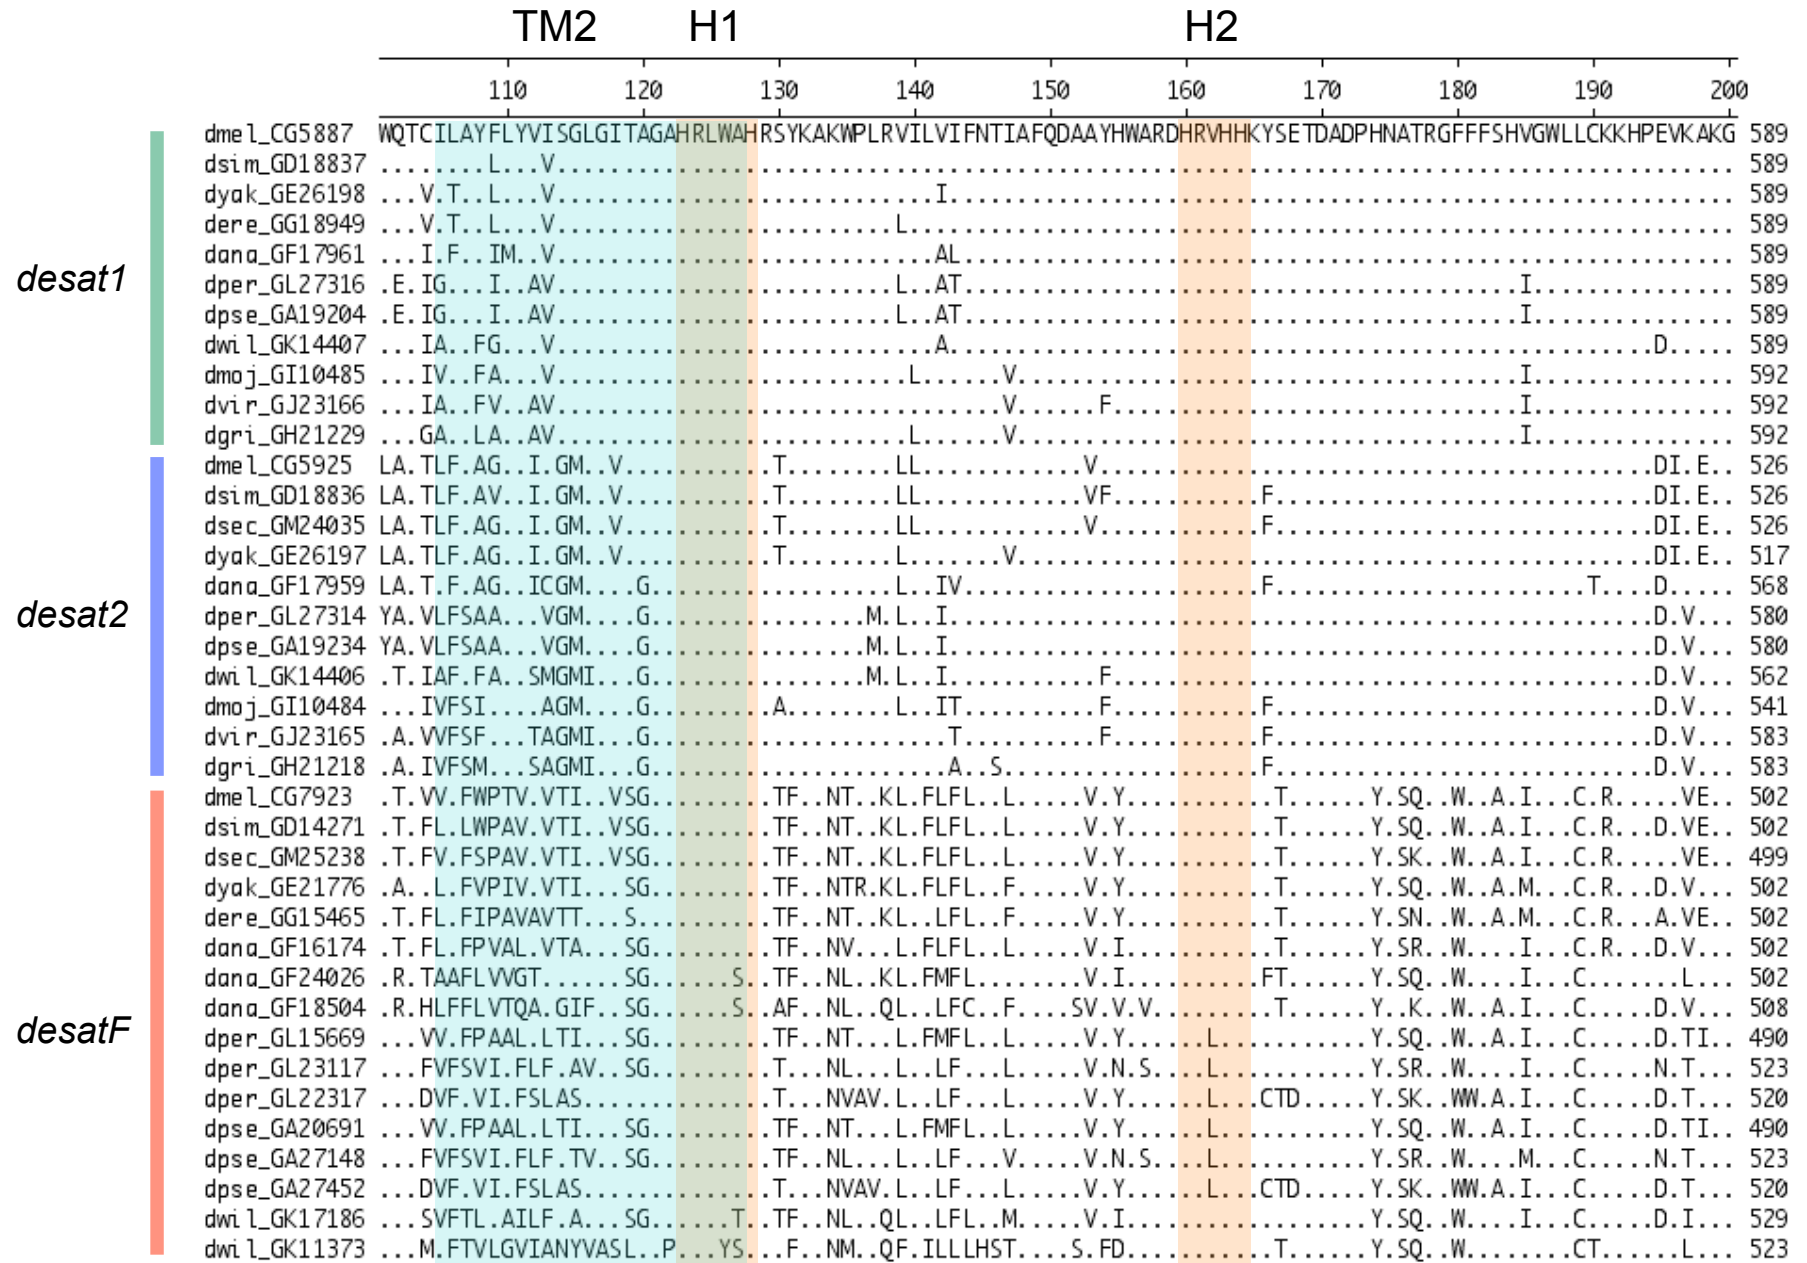

Fig. S2-2

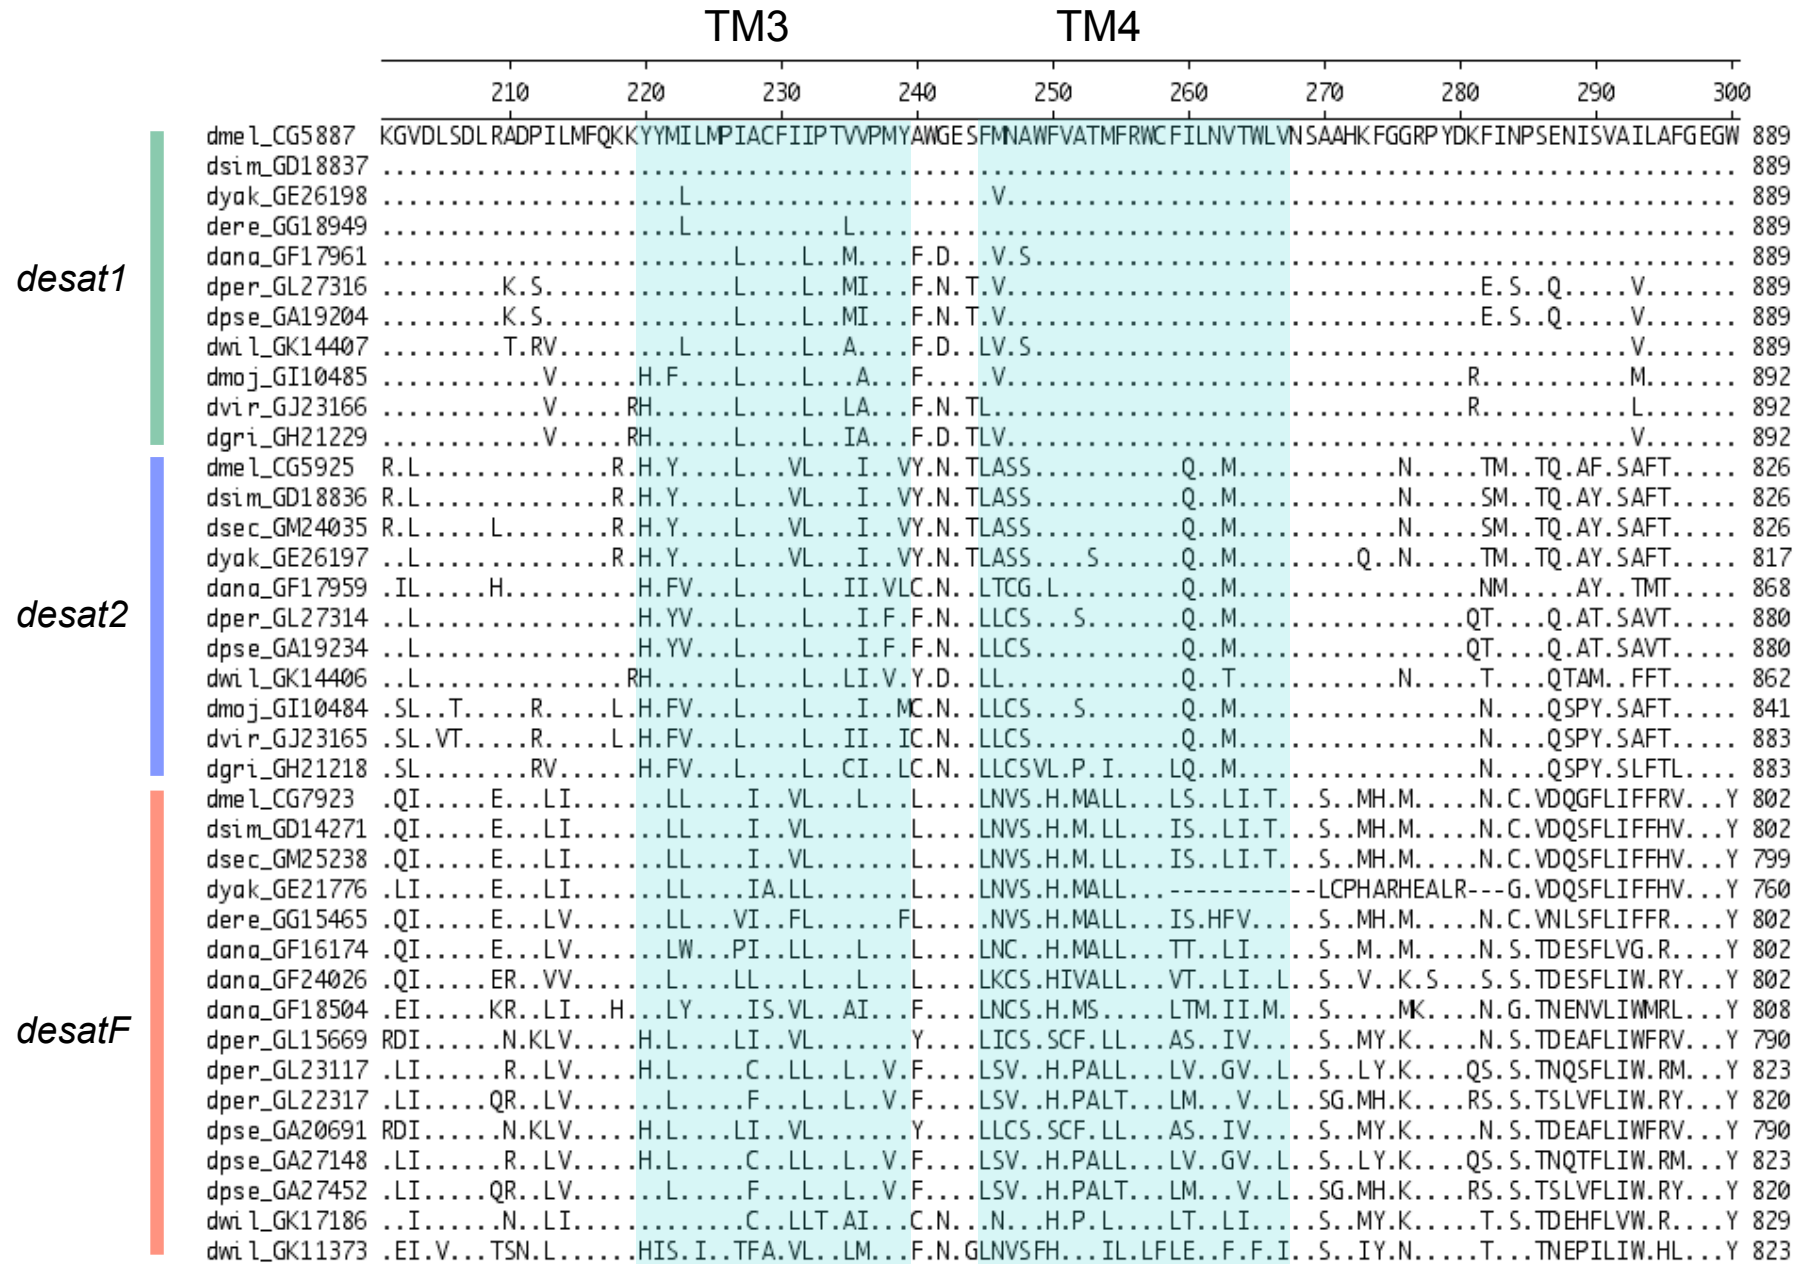

Fig. S2-3



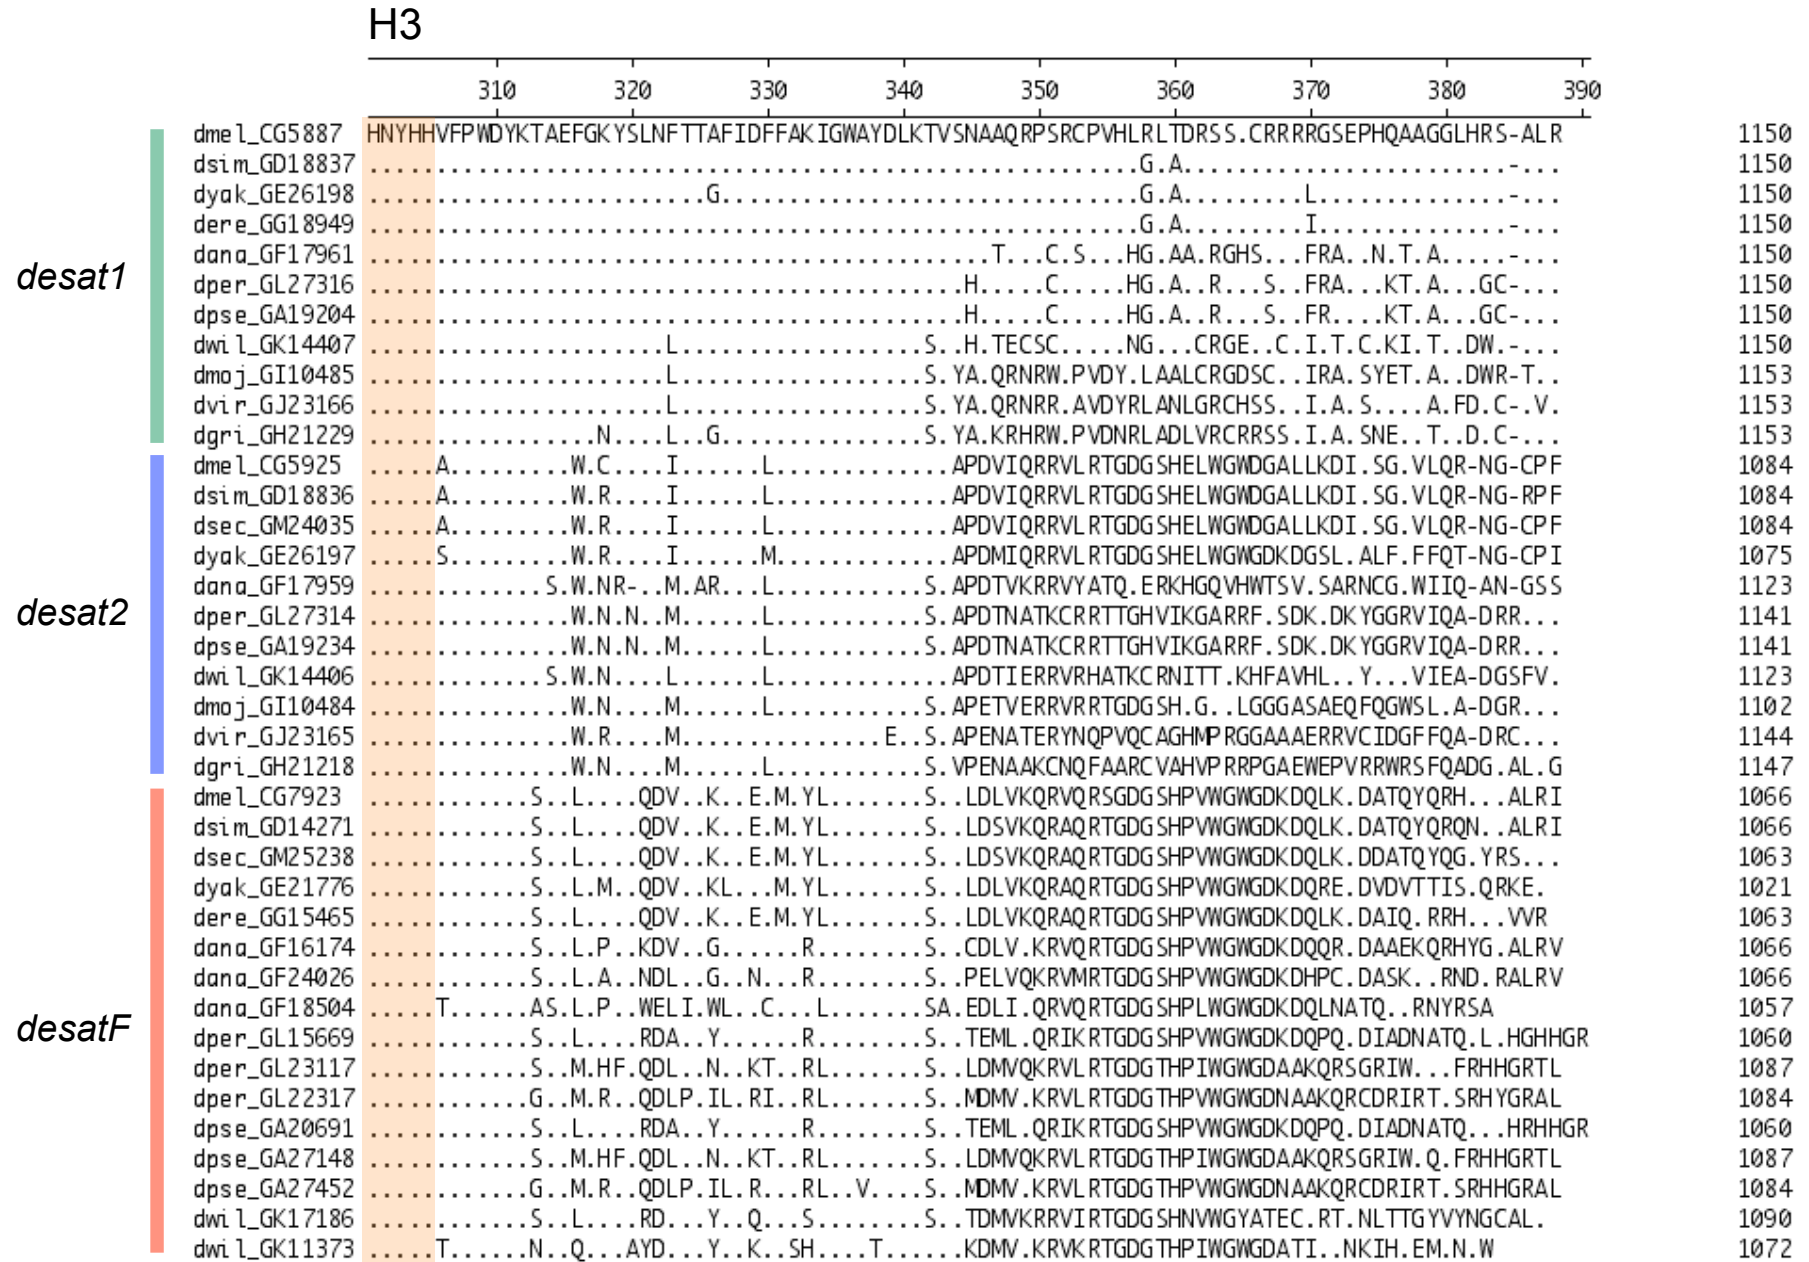

Fig. S2-4
